# Supplementary material for: Modulation of Hypoxia-Induced Chemoresistance to Polymeric Micellar Cisplatin: The Effect of Ligand Modification of Micellar Carrier Versus Inhibition of the Mediators of Drug Resistance
Source: MDPI journal article supplement (doi:10.3390/pharmaceutics10040196), 2018-10-21
Supplement: s1 [file s1]

# **Modulation of Hypoxia-Induced Chemoresistance to Polymeric Micellar Cisplatin: The Effect of Ligand Modification of Micellar Carrier Versus Inhibition of the Mediators of Drug Resistance**

**Hoda Soleymani Abyaneh<sup>1</sup>, Amir Hassan Soleimani<sup>1</sup>, Mohammad Reza Vakili<sup>1</sup>, Rania Soudy<sup>1,3</sup>, Kamaljit Kaur<sup>1,4</sup>, Francesco Cuda<sup>5</sup>, Ali Tavassoli<sup>5</sup>, Afsaneh Lavasanifar<sup>1,2</sup> \***

<sup>1</sup> *Faculty of Pharmacy and Pharmaceutical Sciences, University of Alberta, Edmonton, AB T6G 2E1, Canada; hoda1@ualberta.ca (H.S.A.); asoleimani212@gmail.com (A.H.S.); vakili@ualberta.ca (M.R.V.); soudy@ualberta.ca (R.S.); kkaur@chapman.edu (K.K.); afsaneh@ualberta.ca (A.L.)*

<sup>2</sup> *Department of Chemical & Materials Engineering, Faculty of Engineering, University of Alberta, Edmonton, AB T6G 1H9, Canada*

<sup>3</sup> *Faculty of Pharmacy, Cairo University, Kasr El-Aini, Cairo 11562, Egypt*

<sup>4</sup> *School of Pharmacy, Chapman University, Irvine, California 92618, USA*

<sup>5</sup> *School of Chemistry, University of Southampton, Southampton SO17 1BJ, UK; francesco\_cuda@yahoo.co.uk (F.C.); A.Tavassoli@soton.ac.uk (A.T.)*

*\* Correspondence: Afsaneh Lavasanifar (A.L.), Email: afsaneh@ualberta.ca; Tel.: +1-780-492-27-42; fax: +1 780-492-12-17*

## Supporting material

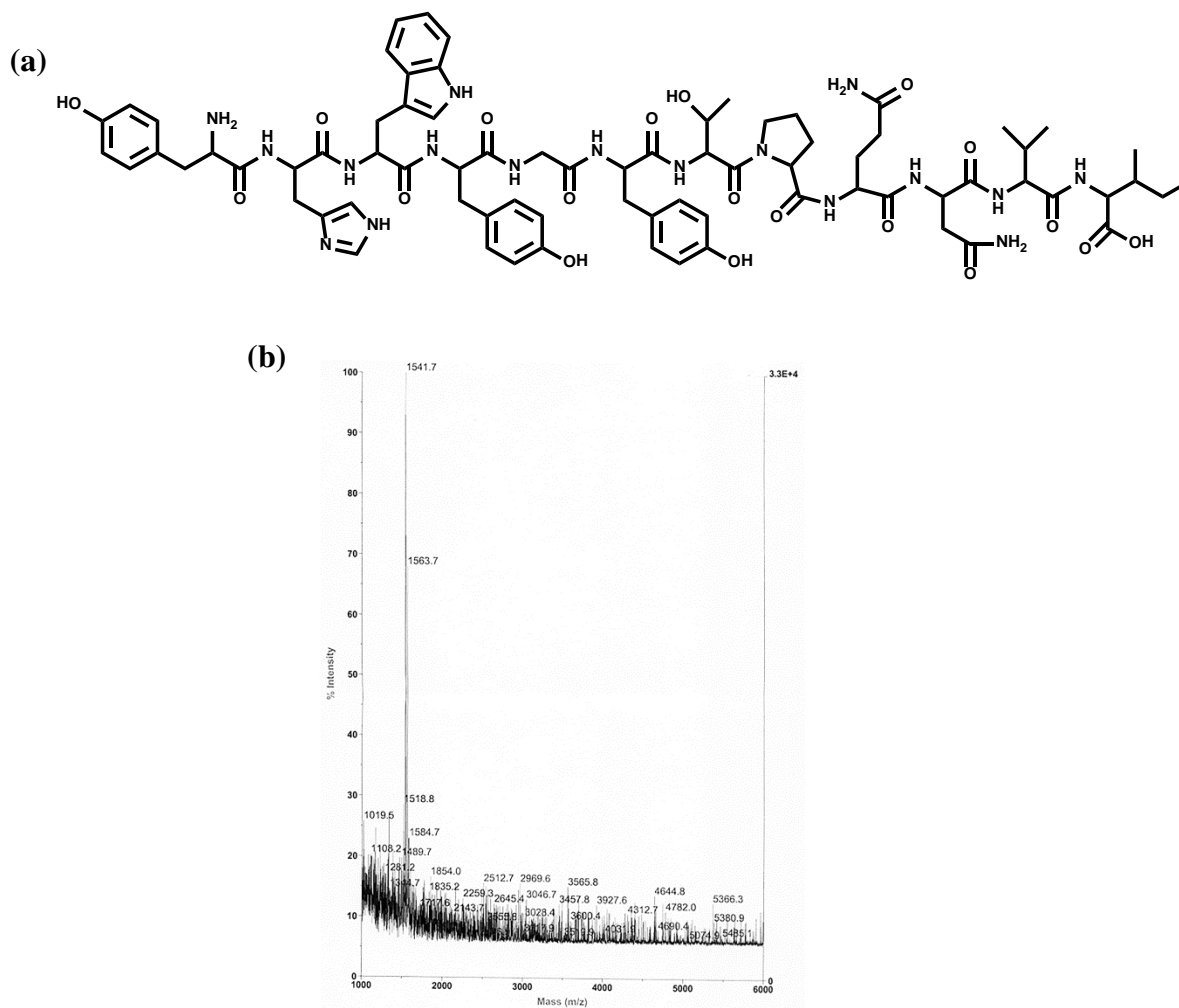

**Figure S1. (a)** GE11 peptide structure and **(b)** MALDI-MS spectrum of GE11 peptide.

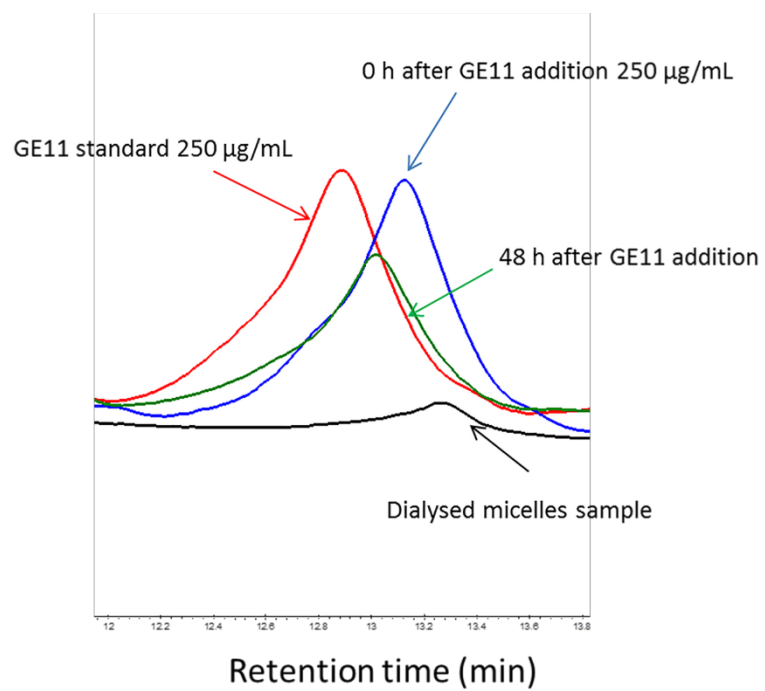

**Figure S2.** Monitoring GE11 peptide conjugation to acetal-PEO-PCCL polymers using HPLC with UV detection at 214 nm.

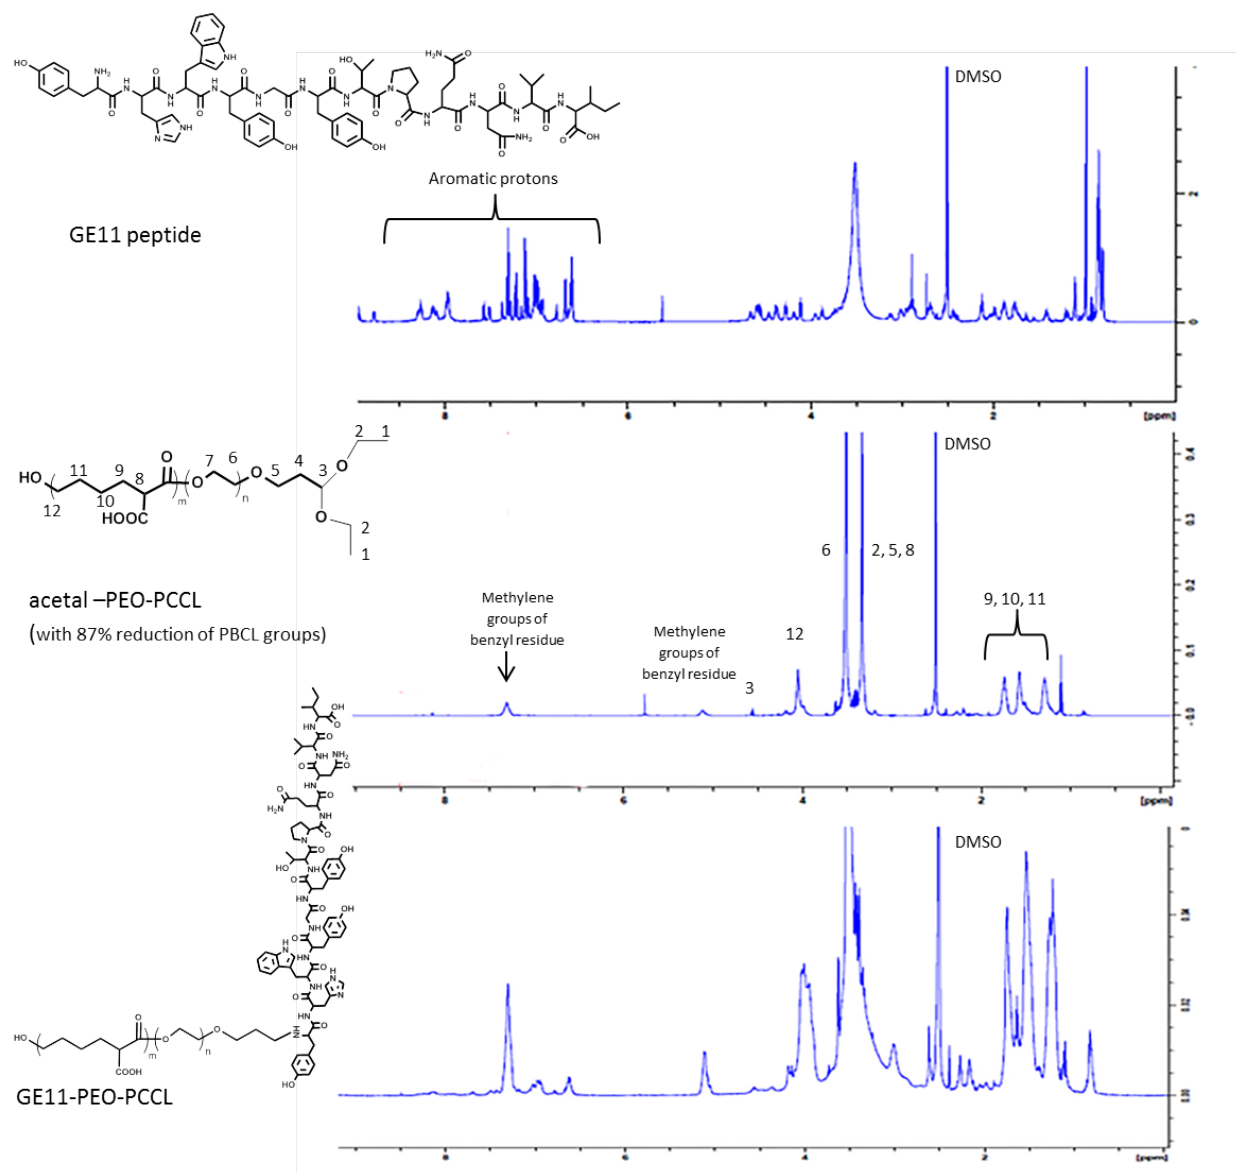

**Figure S3.** The conjugation of GE11 peptide onto acetal-PEO-PCCL was confirmed by  $^1\text{H}$ -NMR spectra of block copolymer before and after peptide conjugation. Samples (3-5 mg/mL) of acetal-PEO-PCCL and GE11-PEO-PCC were prepared in DMSO for  $^1\text{H}$  NMR analysis.

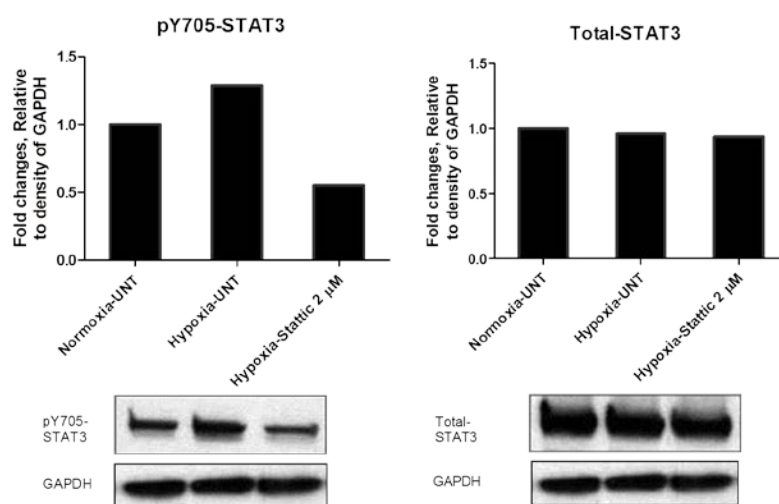

**Figure S4.** Bar graph illustrating quantification of the Western blot densitometry analysis for Figure 5A. Densitometry data are expressed as fold changes compared to untreated normoxic group, normalized to GAPDH band intensity.

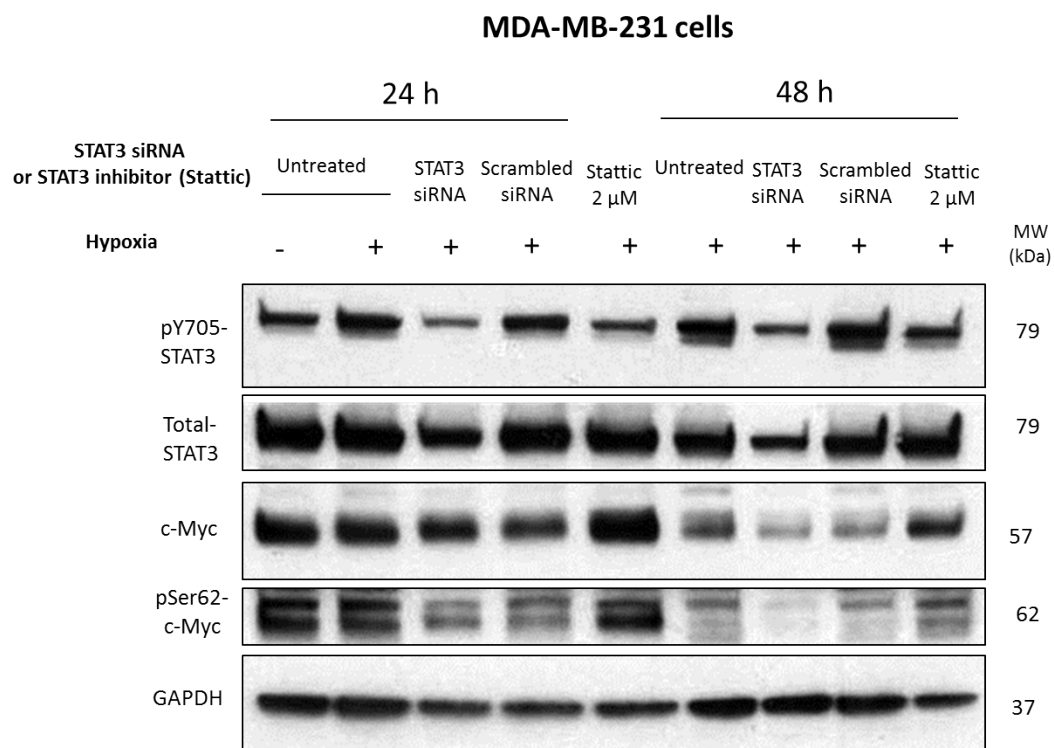

**Figure S5.** The chosen experimental model for inhibition of STAT3 activation, STAT3 siRNA transfection versus pharmacological inhibition by Stattic, may result in different levels of expression of STAT3 and/or its downstream targets such as c-Myc protein. The differential levels of protein expression in MDA-MB-231 cells after transfection with STAT3 siRNA or treatment with Stattic (2μM) for 24 to 48 hours under hypoxia is depicted by Western blot.
